# Supplementary material
Source: publisher figshare collection journal article supplement (https://acs.figshare.com/ndownloader/files/23713678)
Supplement: Supplementary file 1 [file 23713678]

# **The remarkable role of grain boundaries in the thermal transport properties of phosphorene**

Xiangjun Liu<sup>1</sup>, Junfeng Gao<sup>2</sup>, Gang Zhang<sup>3</sup>, Jijun Zhao<sup>2</sup>, Yong-Wei Zhang<sup>3</sup>

<sup>1</sup>Institute of Micro/Nano Electromechanical System, College of Mechanical Engineering,  
Donghua University, Shanghai, China.

<sup>2</sup> Key Laboratory of Materials Modification by Laser, Ion and Electron Beams (Ministry of  
Education), Dalian University of Technology, Dalian, China

<sup>3</sup> Institute of High Performance Computing, A\*STAR, Singapore

Figure S1. The structures of four types of phosphorene GBs.

Table S1. Structural parameters and thermal conductivities of four types of phosphorene GBs.

Table S2. Heat flux  $J$ , temperature jump  $\Delta T$ , and thermal boundary resistances  $R$  in N5 GBs with different structure size.



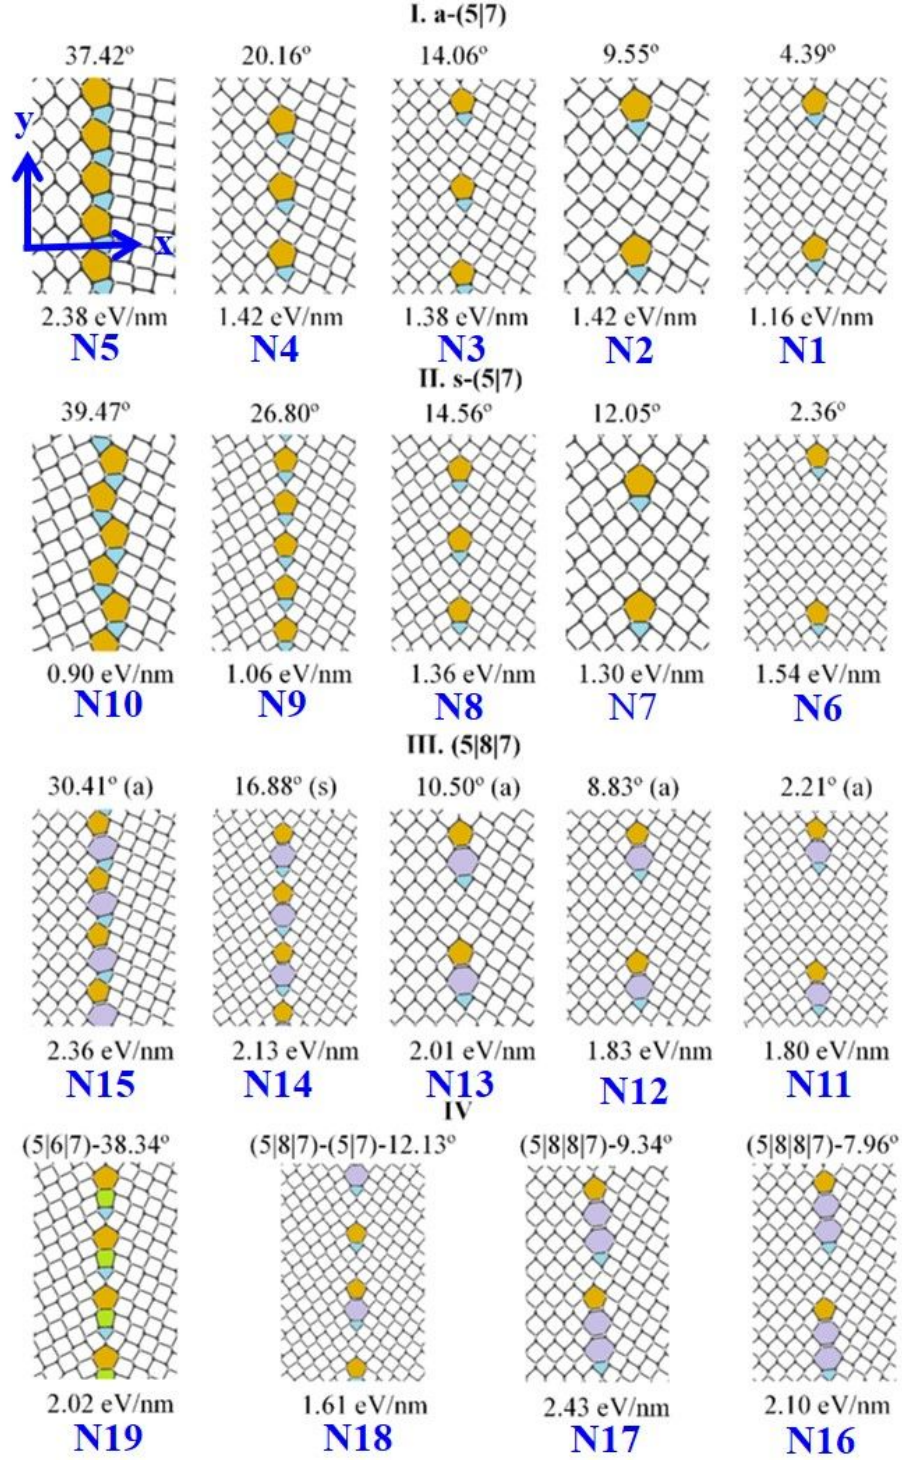

Figure S1. The structures of four types of phosphorene GBs. The misorientation angle and formation energy are also given. Smaller formation energy means easier to form the GB. Reprinted with permission from Ref. [24], copyright (2019) by the IOP Publishing.

Table S1. Structural parameters and thermal conductivities of four types of phosphorene GBs.

| <b>I. a-(5 7)</b>                        | <b>N1</b>  | <b>N2</b>  | <b>N3</b>  | <b>N4</b>  | <b>N5</b>  |
|------------------------------------------|------------|------------|------------|------------|------------|
| $\theta$                                 | 4.39°      | 9.55°      | 14.06°     | 20.16°     | 37.42°     |
| $d_H(\text{\AA})$                        | 23.45      | 18.63      | 14.11      | 9.59       | 5.43       |
| $\kappa_x (\text{Wm}^{-1}\text{K}^{-1})$ | 37.5       | 35.0       | 29.5       | 20.3       | 14.5       |
| $\kappa_y (\text{Wm}^{-1}\text{K}^{-1})$ | 7.0        | 6.6        | 6.3        | 7.3        | 10.3       |
| <b>II. s-(5 7)</b>                       | <b>N6</b>  | <b>N7</b>  | <b>N8</b>  | <b>N9</b>  | <b>N10</b> |
| $\theta$                                 | 2.36°      | 12.05°     | 14.56°     | 26.80°     | 39.47°     |
| $d_H(\text{\AA})$                        | 27.99      | 32.55      | 23.63      | 14.29      | 9.85       |
| $\kappa_x (\text{Wm}^{-1}\text{K}^{-1})$ | 34.7       | 32.6       | 22.1       | 17.8       | 16.8       |
| $\kappa_y (\text{Wm}^{-1}\text{K}^{-1})$ | 5.9        | 5.9        | 5.6        | 7.0        | 8.5        |
| <b>III. (5 8 7)</b>                      | <b>N11</b> | <b>N12</b> | <b>N13</b> | <b>N14</b> | <b>N15</b> |
| $\theta$                                 | 2.21°      | 8.83°      | 10.50°     | 16.88°     | 30.41°     |
| $d_H(\text{\AA})$                        | 27.99      | 23.26      | 18.91      | 23.60      | 9.51       |
| $\kappa_x (\text{Wm}^{-1}\text{K}^{-1})$ | 16.1       | 14.0       | 12.0       | 9.3        | 7.9        |
| $\kappa_y (\text{Wm}^{-1}\text{K}^{-1})$ | 4.6        | 4.4        | 4.5        | 4.3        | 4.1        |
| <b>IV. (5 6-8 7)</b>                     | <b>N16</b> | <b>N17</b> | <b>N18</b> | <b>N19</b> |            |
| $\theta$                                 | 7.96°      | 9.34°      | 12.13°     | 38.34°     |            |
| $d_H(\text{\AA})$                        | 23.34      | 18.75      | 28.09      | 9.86       |            |
| $\kappa_x (\text{Wm}^{-1}\text{K}^{-1})$ | 9.8        | 9.0        | 8.9        | 8.6        |            |
| $\kappa_y (\text{Wm}^{-1}\text{K}^{-1})$ | 2.9        | 2.9        | 2.5        | 2.6        |            |

Table S2. Heat flux  $J$ , temperature jump  $\Delta T$ , and thermal boundary resistances  $R$  in N5 GBs with different structure size.

| <b>Sample No.</b> | <b><math>L_L=L_R</math></b><br>(Å) | <b><math>L_M</math></b><br>(Å) | <b><math>J</math></b><br>( $\times 10^9 \text{ Wm}^{-2}$ ) | <b><math>\Delta T</math></b><br>(K) | <b><math>R</math></b><br>( $\times 10^{-10} \text{ m}^2\text{KW}^{-1}$ ) |
|-------------------|------------------------------------|--------------------------------|------------------------------------------------------------|-------------------------------------|--------------------------------------------------------------------------|
| <b>1</b>          | 361.4                              | 464.6                          | 3.49                                                       | 3.46                                | 9.93                                                                     |
| <b>2</b>          | 722.8                              | 464.6                          | 2.68                                                       | 2.55                                | 9.52                                                                     |
| <b>3</b>          | 722.8                              | 836.3                          | 2.49                                                       | 2.52                                | 10.13                                                                    |
